# Supplementary material for: Update on the distribution of Mansonella perstans in the southern part of Cameroon: influence of ecological factors and mass drug administration with ivermectin
Source: PubMed Central journal article supplement (PMC4886396; doi:10.1186/s13071-016-1595-1), 2016-05-31
Supplement: 13071_2016_1595_MOESM2_ESM.pdf [file 13071_2016_1595_MOESM2_ESM.pdf]

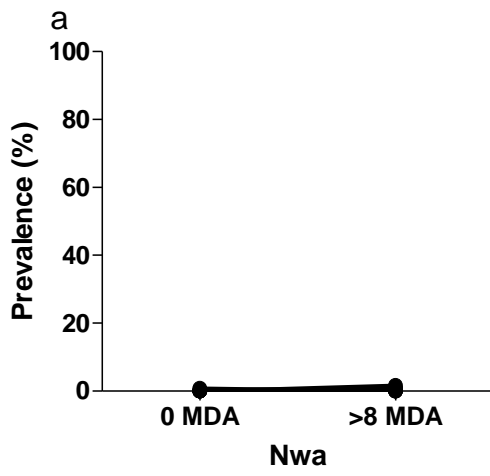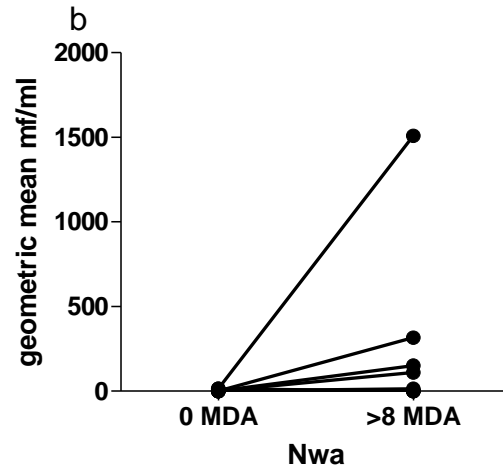

Additional file 2
